# Supplementary material for: Novel Antibodies Reveal Inclusions Containing Non-Native SOD1 in Sporadic ALS Patients
Source: PLoS One. 2010 Jul 14;5(7):e11552. doi: 10.1371/journal.pone.0011552 (PMC2904380; doi:10.1371/journal.pone.0011552)
Supplement: Table S2 — SOD2 and SOD3 activities in different CNS areas from controls, SALS and FALS patients. (0.05 MB DOC) [file pone.0011552.s009.doc]

| **Table S2.** SOD2 and SOD3 activities in different CNS areas from controls, SALS and FALS patients. | | | | | | |
| --- | --- | --- | --- | --- | --- | --- |
|  | Controls (n=5) | | SALS (n=5) | | FALS (n=4) | |
| CNS area | SOD2 | SOD3 | SOD2 | SOD3 | SOD2 | SOD3 |
| Frontal lobe | 1,060  300 | 88  41 | 1,020  130 | 84  21 | 760  270 | 87  12 |
| Temporal lobe | 880  120 | 89  27 | 830  130 | 88  26 | 870  320 | 102  26 |
| Precentral gyrus | 930  380 | 101  33 | 920  120 | 70  14 | 1,070  620 | 107  4 |
| Corona radiata | 290  80 | 47  14 | 380  260 | 42  11 | 330  170 | 47  12 |
| Ventral vermis | 1,090  270 | 78  41 | 1,070  270 | 76  20 | 980  340 | 111  88 |
| Lamina tecti | 1,210  690 | 148  142 | 1,270  40 | 79  26 | 1,030  560 | 106  58 |
| Motor nuclei | 680  240 | 81  38 | 830  260 | 87  46 | 870  210 | 241  277 |
| Cervical ventral horn | 450  50 | 150  47 | 730  460 | 114  53 | 680  120 | 152  84 |
| Cervical dorsal funicle | 240  50 | 129  55 | 290  150 | 138  78 | 560  550 | 192  78 |
| Cervical cortico-spinal tract | 280  100 | 115  133 | 820  210 | 162  100 | 810  780 | 96  38 |
| Lumbar ventral horn | 720  170 | 87  35 | 810  270 | 124  82 | 790  420 | 86  34 |
| Lumbar dorsal horn | 540  60 | 98  58 | 460  100 | 154  116 | 550  140 | 124  76 |
| Lumbar dorsal funicle | 300  110 | 109  54 | 260  100 | 132  65 | 210  60 | 199  162 |
| Lumbar cortico-spinal tract | 480  90 | 153  65 | 570  160 | 158  101 | 730  340 | 295  104 |
| Nucleus of Onufrowicz | 570  200 | 239  180 | 660  230 | 175  93 | 600  340 | 384  49 |

Data are presented as mean ± SD (U/g wet weight). No significant differences between controls, SALS and FALS cases were found for any of the CNS areas, by analysis of variance (ANOVA).
